# Supplementary material
Source: bioRxiv or medRxiv preprint supplement (https://www.biorxiv.org/highwire/filestream/169/field_highwire_adjunct_files/1/000653-2.pdf)
Supplement: Supplementary file [file 000653-2.pdf]

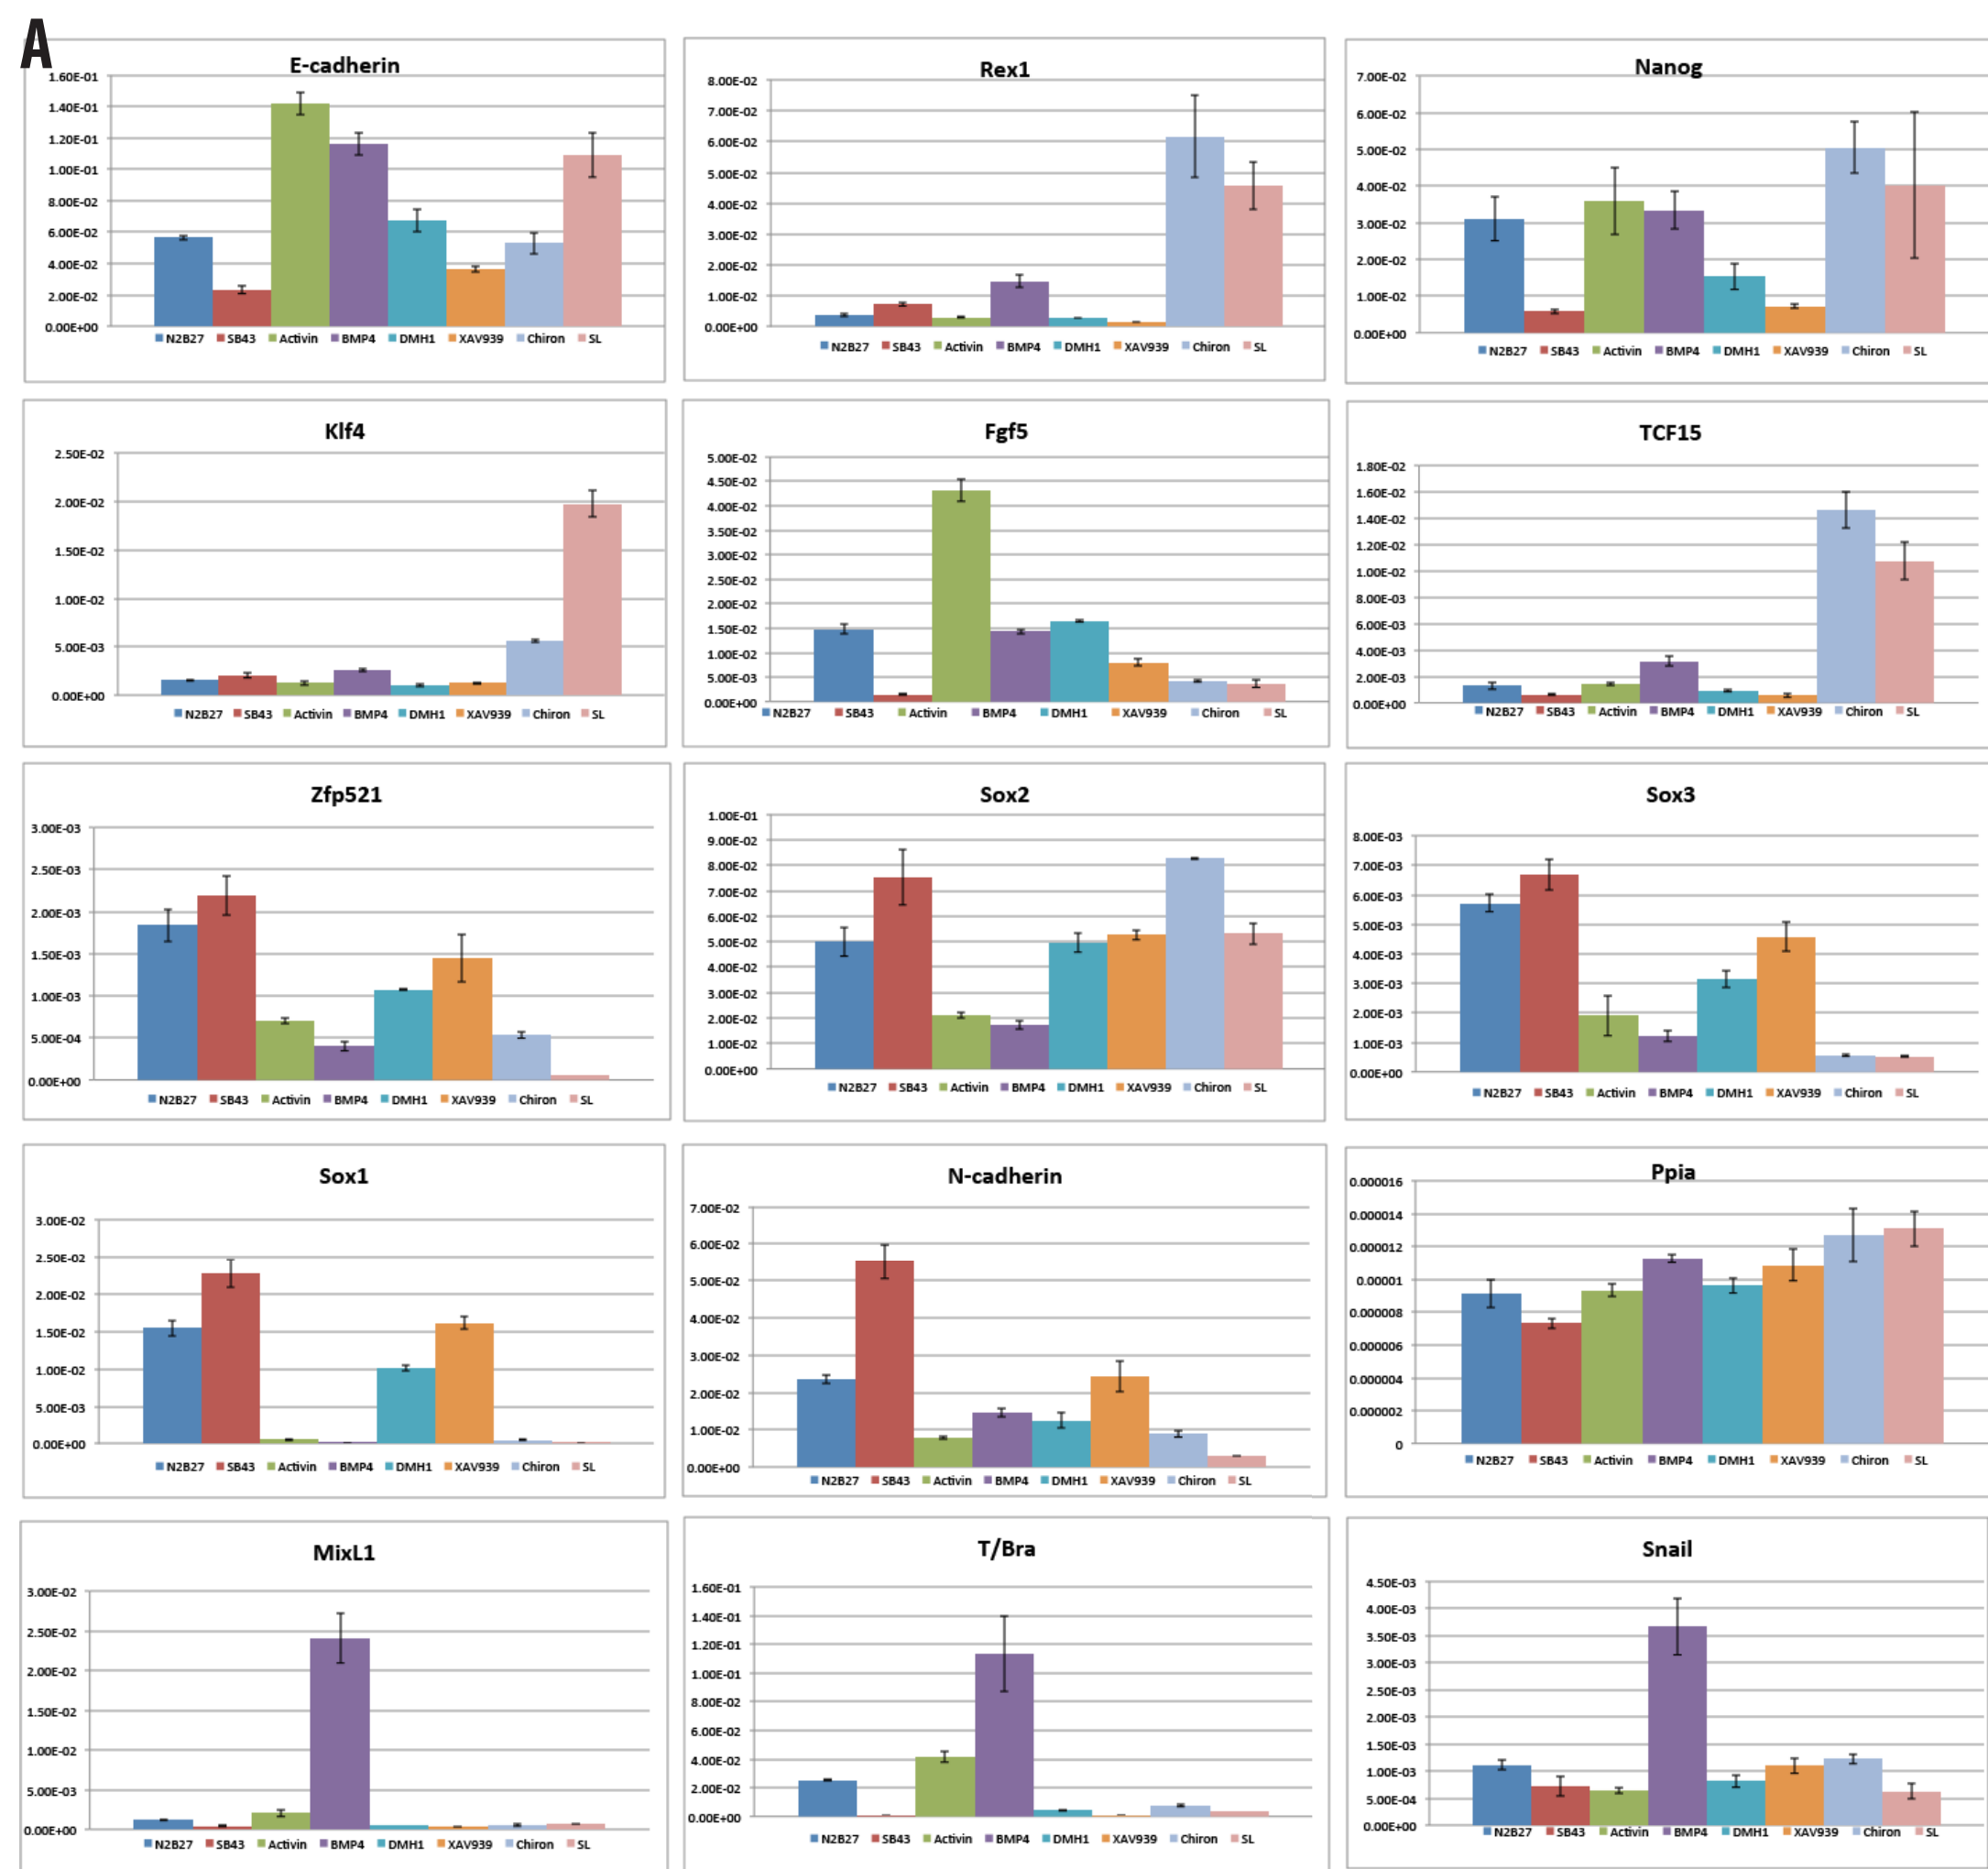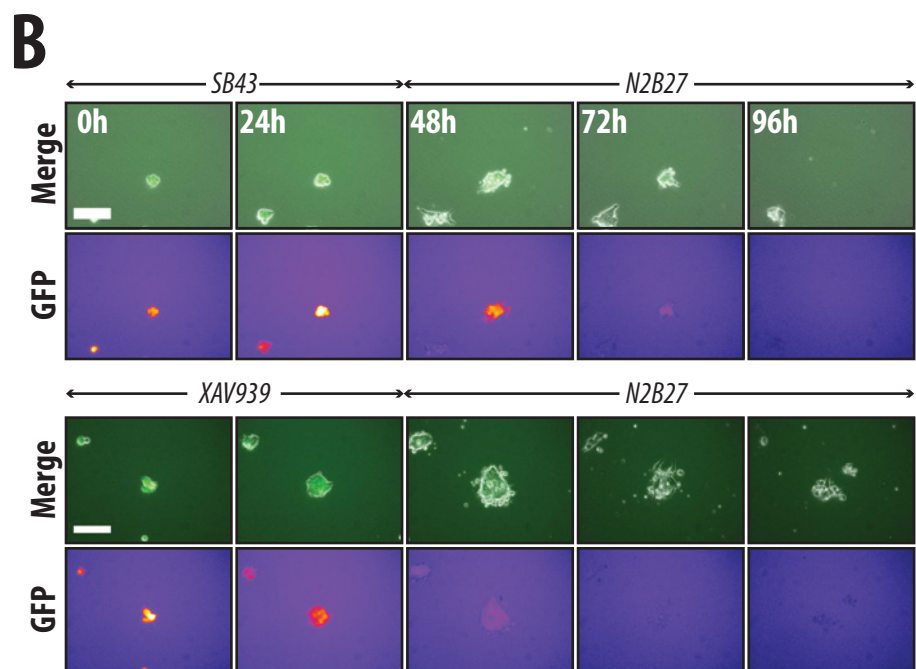

(A) Sox1::GFP cells were grown in the indicated medium (ordinate) for 2 days and a further day in N2B27 prior to RNA extraction and RT-qPCR analysis for the indicated genes (graph titles). Data normalised to the house-keeping gene Ppia (see supplemental data for Fig. 3).

(B) Live-cell imaging of TNGA Nanog::GFP cells treated with a 2 day pulse of either SB43 or XAV939 before wash-off and medium replacement with N2B27. Scale-bar indicates 100µm.
